# Supplementary material for: Performance Verification of CYP2C19 Enzyme Abundance Polymorphism Settings within the Simcyp Simulator v21
Source: Metabolites. 2022 Oct 20;12(10):1001. doi: 10.3390/metabo12101001 (PMC9607610; doi:10.3390/metabo12101001)
Supplement: Supplementary file 1 [file metabolites-12-01001-s001.zip › Supp Table S2 CYP2C19 literature search.xlsx]

## Sheet: Notes
? = population is implied from location of hospital where clinical trial was run
PK parameters = Cmax and AUC available

## Sheet: Omeprazole docs
Author	Year	Journal	Accession #	Dose (mg)	Brand	Regimen	Fasted/Fed	CYP2C19 phenotypes	Population	Subject #	Fraction female	Age (years)	Conc data?	PK parameters?	Notes
Baldwin	2008	Br J Clin Pharmacol	18294333	40	Losec Mups	single oral	Fasted	*17/*17	Swedish?	5	0.6	24-45	No	Yes
Baldwin	2008	Br J Clin Pharmacol	18294333	40	Losec Mups	single oral	Fasted	*1/*1	Swedish?	11	0.818182	21-60	No	Yes
Chang	1995	Pharmacogenetics	8747407	No useful data (no concentration or PK parameter data)
Chang	1995	Br J Clin Pharmacol	7669487	20	Losec	8-day repeat dose	Fasted	PM	Swedish	5	0.2	23-32	Yes	Yes
Chang	1995	Br J Clin Pharmacol	7669487	20	Losec	8-day repeat dose	Fasted	rapid EM	Swedish	5	0.2	24-33	Yes	Yes	Modeled as UM
Chang	1995	Br J Clin Pharmacol	7669487	20	Losec	8-day repeat dose	Fasted	het EM	Swedish	4	0.25	24-33	Yes	Yes
Cho	2002	Br J Clin Pharmacol	11966672	40	Losec	single oral	Fasted	wt/wt	Korean	8	0.1875	20-36	Yes	Yes	DDI with moclobemide
Cho	2002	Br J Clin Pharmacol	11966672	40	Losec	single oral	Fasted	m1/m1 & m1/m2	Korean	8	0.1875	20-36	Yes	Yes	DDI with moclobemide
Chwiesko	2016	J Dig Dis	27518195	Data from patients with non-variceal upper GI bleeding
Furuta	1999	Clin Pharmacol Ther	10511062	20	NA	single oral	Fasted	wt/wt	Japanese?	6	0.166667	25-30	Yes	Yes	DDI with clarithromycin
Furuta	1999	Clin Pharmacol Ther	10511062	20	NA	single oral	Fasted	wt/m1 or wt/m2	Japanese?	11	0.181818	28-34	Yes	Yes	DDI with clarithromycin
Furuta	1999	Clin Pharmacol Ther	10511062	20	NA	single oral	Fasted	m1/m2	Japanese?	4	0.5	25-31	Yes	Yes	DDI with clarithromycin
Furuta	1999	Clin Pharmacol Ther	10340921	20	NA	single oral	Fasted	wt/wt	Japanese	5	0.2	22-23	Yes	Yes
Furuta	1999	Clin Pharmacol Ther	10340921	20	NA	single oral	Fasted	wt/m1 or wt/m2	Japanese	4	0.25	22-24	Yes	Yes
Furuta	1999	Clin Pharmacol Ther	10340921	20	NA	single oral	Fasted	m1/m2 or m1/m1	Japanese	6	0.333333	23-24	Yes	Yes
Furuta	2005	Drug Metab Pharmacokinet	15988117	review
He	2003	Xenobiotica	12623762	20	NA	single oral	Fasted	*1/*1	Chinese	6	0	20-24	Yes	Yes	Do not use raw concentration data; graph is not a linear or log scale
He	2003	Xenobiotica	12623762	20	NA	single oral	Fasted	*1/*2 & *1/*3	Chinese	6	0	20-24	Yes	Yes	Do not use raw concentration data; graph is not a linear or log scale
He	2003	Xenobiotica	12623762	20	NA	single oral	Fasted	*2/*2 & *3/*3	Chinese	6	0	20-24	Yes	Yes	Do not use raw concentration data; graph is not a linear or log scale
Herrlin	1998	Clin Pharmacol Ther	9797796	No useful data (no concentration or PK parameter data)
Hu	2007	J Clin Pharm Ther	17875119	20	EC capsules	8-day repeat dose	Fasted	*1/*1	Chinese	6	0	22-24	Yes	Yes
Hu	2007	J Clin Pharm Ther	17875119	20	EC capsules	8-day repeat dose	Fasted	*1/*2 & *1/*3	Chinese	6	0	20-24	Yes	Yes
Hu	2007	J Clin Pharm Ther	17875119	20	EC capsules	8-day repeat dose	Fasted	*2/*2	Chinese	6	0	20-23	Yes	Yes
Hunfeld	2008	Br J Clin Pharmacol	18241283	10	capsules	6-day repeat oral	Unknown	*1/*1	Caucasian	5	0.4	20-29	No	Yes	Age specified only for larger group; not individual genotypes
Hunfeld	2008	Br J Clin Pharmacol	18241283	10	capsules	6-day repeat oral	Unknown	*1/*2	Caucasian	4	0.75	20-29	No	Yes	Age specified only for larger group; not individual genotypes
Hunfeld	2008	Br J Clin Pharmacol	18241283	10	capsules	6-day repeat oral	Unknown	*1/*17	Caucasian	1	0	20-29	No	Yes	Age specified only for larger group; not individual genotypes
Hunfeld	2008	Br J Clin Pharmacol	18241283	10	capsules	6-day repeat oral	Unknown	*2/*2	Caucasian	0	0	20-29	No	Yes	Age specified only for larger group; not individual genotypes
Hunfeld	2008	Br J Clin Pharmacol	18241283	10	capsules	6-day repeat oral	Unknown	*2/*17	Caucasian	1	1	20-29	No	Yes	Age specified only for larger group; not individual genotypes
Hunfeld	2008	Br J Clin Pharmacol	18241283	20	MUPS	6-day repeat oral	Unknown	*1/*1	Caucasian	6	0.5	21-30	No	Yes	Age specified only for larger group; not individual genotypes
Hunfeld	2008	Br J Clin Pharmacol	18241283	20	MUPS	6-day repeat oral	Unknown	*1/*2	Caucasian	2	1	21-30	No	Yes	Age specified only for larger group; not individual genotypes
Hunfeld	2008	Br J Clin Pharmacol	18241283	20	MUPS	6-day repeat oral	Unknown	*1/*17	Caucasian	6	0.5	21-30	No	Yes	Age specified only for larger group; not individual genotypes
Hunfeld	2008	Br J Clin Pharmacol	18241283	20	MUPS	6-day repeat oral	Unknown	*2/*2	Caucasian	1	0	21-30	No	Yes	Age specified only for larger group; not individual genotypes
Hunfeld	2008	Br J Clin Pharmacol	18241283	20	MUPS	6-day repeat oral	Unknown	*2/*17	Caucasian	1	1	21-30	No	Yes	Age specified only for larger group; not individual genotypes
Ieiri	1996	Clin Pharmacol Ther	8681489	20	Omepral	single oral	Fasted	wt/wt	Japanese	10	0.222222	21-47	No	Yes	Sex/age specified only for larger group; not individual genotypes
Ieiri	1996	Clin Pharmacol Ther	8681489	20	Omepral	single oral	Fasted	wt/m1	Japanese	5	0.222222	21-47	No	Yes	Sex/age specified only for larger group; not individual genotypes
Ieiri	1996	Clin Pharmacol Ther	8681489	20	Omepral	single oral	Fasted	wt/m2	Japanese	5	0.222222	21-47	No	Yes	Sex/age specified only for larger group; not individual genotypes
Ieiri	1996	Clin Pharmacol Ther	8681489	20	Omepral	single oral	Fasted	m1/m2	Japanese	2	0.222222	21-47	No	Yes	Sex/age specified only for larger group; not individual genotypes
Ieiri	1996	Clin Pharmacol Ther	8681489	20	Omepral	single oral	Fasted	m1/m1	Japanese	5	0.222222	21-47	No	Yes	Sex/age specified only for larger group; not individual genotypes
Ieiri	2005	Pharmacogenet Genomics	16272957	20	Omepral	single oral	Fasted	*1/*1	Japanese	6	Unknown	20-33	Yes	Yes	DDI with ticlopidine; age specified only for larger group; not individual genotypes
Ieiri	2005	Pharmacogenet Genomics	16272957	20	Omepral	single oral	Fasted	*1/*2	Japanese	6	Unknown	20-33	Yes	Yes	DDI with ticlopidine; age specified only for larger group; not individual genotypes
Ieiri	2005	Pharmacogenet Genomics	16272957	20	Omepral	single oral	Fasted	*2/*2 & *2/*3	Japanese	6	Unknown	20-33	Yes	Yes	DDI with ticlopidine; age specified only for larger group; not individual genotypes
Ishizawa	2005	Clin Pharmacokinet	16231968	20	NA	IV	Fasted	homo EM	Japanese	8	0.375	21-29	Yes	Yes	Young
Ishizawa	2005	Clin Pharmacokinet	16231968	20	NA	IV	Fasted	Het EM	Japanese	9	0.555556	20-30	Yes	Yes	Young
Ishizawa	2005	Clin Pharmacokinet	16231968	20	NA	IV	Fasted	PM	Japanese	6	0.333333	22-33	Yes	Yes	Young
Ishizawa	2005	Clin Pharmacokinet	16231968	10	NA	IV	Fasted	homo EM	Japanese	8	1	71-81	Yes	Yes	Exclude b/c elderly
Ishizawa	2005	Clin Pharmacokinet	16231968	10	NA	IV	Fasted	Het EM	Japanese	12	0.5	71-85	Yes	Yes	Exclude b/c elderly
Ishizawa	2005	Clin Pharmacokinet	16231968	10	NA	IV	Fasted	PM	Japanese	8	1	73-83	Yes	Yes	Exclude b/c elderly
Jin	2009	J Clin Pharm Ther	19583677	40	Losec	single oral	Fasted	*1/*1	Korean	9	0.444444	21-23	Yes	Yes
Jin	2009	J Clin Pharm Ther	19583677	40	Losec	single oral	Fasted	*2/*2	Korean	3	0.666667	23-29	Yes	Yes
Jin	2009	J Clin Pharm Ther	19583677	40	Losec	single oral	Fasted	*1/*2	Korean	6	0.333333	22-27	Yes	Yes
Jin	2009	J Clin Pharm Ther	19583677	40	Losec	single oral	Fasted	*1/*3	Korean	6	0.333333	21-28	Yes	Yes
Jin	2009	J Clin Pharm Ther	19583677	40	Losec	single oral	Fasted	*2/*3	Korean	6	0.166667	19-33	Yes	Yes
Kearns	2010	Drug Metab Dispos	20223877	No useful data (no concentration or PK parameter data); pediatric data
Le Merdy	2021	Eur J Drug Metab Pharmacokinet	33064292	PBPK model that cites another paper for raw data
Michaud	2014	Pharmacogenomics J	23629159	20	Omeprazole	single oral	Unknown	*17/*17	US?	4	0.5	21-46	No	Yes	DDI with efavirenz as a CYP2C19 inducer; Day 1 included b/c induction effect expected to be weak
Michaud	2014	Pharmacogenomics J	23629159	20	Omeprazole	single oral	Unknown	*1/*1 & *1/*17	US?	33	0.333333	17-37	No	Yes	DDI with efavirenz as a CYP2C19 inducer; Day 1 included b/c induction effect expected to be weak
Michaud	2014	Pharmacogenomics J	23629159	20	Omeprazole	single oral	Unknown	*1/*2 & *1/*3	US?	19	0.421053	20-40	No	Yes	DDI with efavirenz as a CYP2C19 inducer; Day 1 included b/c induction effect expected to be weak
Michaud	2014	Pharmacogenomics J	23629159	20	Omeprazole	single oral	Unknown	*2/*2	US?	1	0	18	No	Yes	DDI with efavirenz as a CYP2C19 inducer; Day 1 included b/c induction effect expected to be weak
Nazir	2016	Pak J Pharm Sci	27166533	40	NA	single oral	Fasted	*1/*1	Pakistan	4	0.5	22-23	Yes	Yes	Age specified only for larger group; not individual genotypes
Nazir	2016	Pak J Pharm Sci	27166533	40	NA	single oral	Fasted	*1/*3	Pakistan	10	0.5	23-24	Yes	Yes	Age specified only for larger group; not individual genotypes
Nazir	2016	Pak J Pharm Sci	27166533	40	NA	single oral	Fasted	*3/*3	Pakistan	12	0.5	23-24	Yes	Yes	Age specified only for larger group; not individual genotypes
Nazir	2015	Eur J Drug Metab Pharmacokinet	24390778	40	NA	single oral	Fasted	*3/*3	Pakistan?	7	1	23-27	No	Yes	Looking at effect of menstrual cycle
Nazir	2015	Eur J Drug Metab Pharmacokinet	24390778	40	NA	single oral	Fasted	*1/*1	Pakistan?	4	1	23-27	No	Yes	Looking at effect of menstrual cycle
Nazir	2015	Eur J Drug Metab Pharmacokinet	24390778	40	NA	single oral	Fasted	*1/*3	Pakistan?	5	1	23-27	No	Yes	Looking at effect of menstrual cycle
Park	2017	Drug Des Devel Ther	28408803	No useful data (no genotyping)
Park	2017	J Korean Med Sci	28378544	20	Losec	8-day repeat dose	Fasted	EM	Korean	8	Unknown	20-45	Yes	Yes	Sex/age specified only for larger group; not individual genotypes
Park	2017	J Korean Med Sci	28378544	20	Losec	8-day repeat dose	Fasted	IM	Korean	6	Unknown	20-45	Yes	Yes	Sex/age specified only for larger group; not individual genotypes
Park	2017	J Korean Med Sci	28378544	20	Losec	8-day repeat dose	Fasted	PM	Korean	8	Unknown	20-45	Yes	Yes	Sex/age specified only for larger group; not individual genotypes
Payan	2014	Daru	25498969	20	NA	single oral	Fasted	*17/*17	Iranian	10	0.5	20-55	Single timept	No	Age specified only for larger group; not individual genotypes
Payan	2014	Daru	25498969	20	NA	single oral	Fasted	*1/*17	Iranian	52	0.288462	20-55	Single timept	No	Age specified only for larger group; not individual genotypes
Payan	2014	Daru	25498969	20	NA	single oral	Fasted	*1/*1	Iranian	75	0.293333	20-55	Single timept	No	Age specified only for larger group; not individual genotypes
Payan	2014	Daru	25498969	20	NA	single oral	Fasted	*1/*2	Iranian	33	0.393939	20-55	Single timept	No	Age specified only for larger group; not individual genotypes
Payan	2014	Daru	25498969	20	NA	single oral	Fasted	*2/*17	Iranian	6	0.333333	20-55	Single timept	No	Age specified only for larger group; not individual genotypes
Payan	2014	Daru	25498969	20	NA	single oral	Fasted	*2/*2	Iranian	4	0.75	20-55	Single timept	No	Age specified only for larger group; not individual genotypes
Qiao	2006	Eur J Clin Pharmacol	16402242	40	Omepral	single oral	Fasted	*1/*1	Chinese	6	0.166667	20-23	Yes	Yes
Qiao	2006	Eur J Clin Pharmacol	16402242	40	Omepral	single oral	Fasted	*1/*3 & *1/*2	Chinese	6	0.166667	20-25	Yes	Yes
Qiao	2006	Eur J Clin Pharmacol	16402242	40	Omepral	single oral	Fasted	*2/*2 & *2/*3 & *3/*3	Chinese	6	0.166667	19-24	Yes	Yes
Roh	2004	Basic Clin Pharmacol Toxicol	15447734	Excluded b/c population had ulcers
Roman	2014	Pharmacogenomics	25495411	40	NA	single oral	Fasted	*1/*1	Caucasian	16	0.470199	20-32	Yes	Yes	1 subject received a high fat diet before dosing; Sex/age specified only for larger group; not individual genotypes
Roman	2014	Pharmacogenomics	25495411	40	NA	single oral	Fasted	*1/*2	Caucasian	7	0.470199	20-32	Yes	Yes	1 subject received a high fat diet before dosing; Sex/age specified only for larger group; not individual genotypes
Roman	2014	Pharmacogenomics	25495411	40	NA	single oral	Fasted	*2/*2	Caucasian	1	0.470199	20-32	Yes	Yes	1 subject received a high fat diet before dosing; Sex/age specified only for larger group; not individual genotypes
Roman	2014	Pharmacogenomics	25495411	40	NA	single oral	Fasted	*1/*17	Caucasian	10	0.470199	20-32	Yes	Yes	1 subject received a high fat diet before dosing; Sex/age specified only for larger group; not individual genotypes
Roman	2014	Pharmacogenomics	25495411	40	NA	single oral	Fasted	*17/*17	Caucasian	0	0.470199	20-32	Yes	Yes	1 subject received a high fat diet before dosing; Sex/age specified only for larger group; not individual genotypes
Roman	2014	Pharmacogenomics	25495411	40	NA	single oral	Fasted	*2/*17	Caucasian	1	0.470199	20-32	Yes	Yes	1 subject received a high fat diet before dosing; Sex/age specified only for larger group; not individual genotypes
Sakai	2001	Pharm Res	11474773	20	Omepral	single oral	Fasted	*1/*1	Japanese	6	0.166667	23-29	Yes	Yes
Sakai	2001	Pharm Res	11474773	20	Omepral	single oral	Fasted	*1/*2 & *1/*3	Japanese	6	0.166667	23-30	Yes	Yes
Sakai	2001	Pharm Res	11474773	20	Omepral	single oral	Fasted	*2/*2 & *2/*3 & *3/*3	Japanese	6	0.166667	22-29	Yes	Yes
Shimizu	2006	J Chromatogr B	16497565	20; 40	Omepral	single IV; single oral	Unknown	*1/*1	Japanese?	3	0.181818	Unknown	Yes	Yes	Sex specified only for larger group; not individual genotypes
Shimizu	2006	J Chromatogr B	16497565	20; 40	Omepral	single IV; single oral	Unknown	*1/*2 & *1/*3	Japanese?	4	0.181818	Unknown	Yes	Yes	Sex specified only for larger group; not individual genotypes
Shimizu	2006	J Chromatogr B	16497565	20; 40	Omepral	single IV; single oral	Unknown	*2/*2 & *2/*3	Japanese?	4	0.181818	Unknown	Yes	Yes	Sex specified only for larger group; not individual genotypes
Shiohira	2012	Pharm Res	22549736	20	Omepral	single IV	Fasted	*1/*1	Japanese?	5	0.352941	21-44	Yes	Yes	Sex/age specified only for larger group; not individual genotypes
Shiohira	2012	Pharm Res	22549736	20	Omepral	single IV	Fasted	*1/*2 & *1/*3	Japanese?	7	0.352941	21-44	Yes	Yes	Sex/age specified only for larger group; not individual genotypes
Shiohira	2012	Pharm Res	22549736	20	Omepral	single IV	Fasted	*2/*2 & *3/*3	Japanese?	5	0.352941	21-44	Yes	Yes	Sex/age specified only for larger group; not individual genotypes
Shirai	2001	Aliment Pharmacol Ther	11736724	20	Omepral	single and 8-day repeat	Fed	*1/*1	Japanese	6	0.333333	24-38	Yes	Yes
Shirai	2001	Aliment Pharmacol Ther	11736724	20	Omepral	single and 8-day repeat	Fed	*1/*2 & *1/*3	Japanese	5	0.2	22-24	Yes	Yes
Shirai	2001	Aliment Pharmacol Ther	11736724	20	Omepral	single and 8-day repeat	Fed	*2/*3 & *2/*2	Japanese	4	0.25	21-28	Yes	Yes
Tu	2010	Xenobiotica	20350051	20	NA	single oral	Fasted	*1/*1	Chinese	6	0	19-22	Yes	Yes	Age specified only for larger group; not individual genotypes
Tu	2010	Xenobiotica	20350051	20	NA	single oral	Fasted	*1/*2 & *1/*3	Chinese	6	0	19-22	Yes	Yes	Age specified only for larger group; not individual genotypes
Tu	2010	Xenobiotica	20350051	20	NA	single oral	Fasted	*2/*3 & *2/*3	Chinese	6	0	19-22	Yes	Yes	Age specified only for larger group; not individual genotypes
Uno	2007	Eur J Clin Pharmacol	17203292	20;40	Omepral	single IV; single oral	Fasted	*1/*1	Japanese	6	0.3	21-44	Yes	Yes	Sex/age specified only for larger group; not individual genotypes
Uno	2007	Eur J Clin Pharmacol	17203292	20;40	Omepral	single IV; single oral	Fasted	*1/*2 & *1/*3	Japanese	8	0.3	21-44	Yes	Yes	Sex/age specified only for larger group; not individual genotypes
Uno	2007	Eur J Clin Pharmacol	17203292	20;40	Omepral	single IV; single oral	Fasted	*2/*2 & *2/*3	Japanese	6	0.3	21-44	Yes	Yes	Sex/age specified only for larger group; not individual genotypes
Wang	2007	Clin Exp Pharmacol Physiol	17439410	No useful data (no concentration or PK parameter data)
Wang	2010	Eur J Clin Pharmacol	20414645	No useful data (no concentration data; PK parameter data in bar graph format)
Xavier	2016	Fundam Clin Pharmacol	27393733	Excluded b/c TB patients
Yamada	2013	Eur J Clin Pharmacol	23435615	40	NA	single oral	Fed	*1/*1	Japanese	34	Unknown	Unknown	Single timept	No
Yamada	2013	Eur J Clin Pharmacol	23435615	40	NA	single oral	Fed	*1/*2 & *1/*3 & *2/*17	Japanese	44	Unknown	Unknown	Single timept	No
Yamada	2013	Eur J Clin Pharmacol	23435615	40	NA	single oral	Fed	*2/*2 & *2/*3 & *3/*3	Japanese	12	Unknown	Unknown	Single timept	No
Yang	2009	Eur J Clin Pharmacol	19172254	20	NA	single oral	Fasted	*1/*1	Chinese	6	0	19-21	Yes	Yes	Age specified only for larger group; not individual genotypes
Yang	2009	Eur J Clin Pharmacol	19172254	20	NA	single oral	Fasted	*1/*2 & *1/*3	Chinese	6	0	19-21	Yes	Yes	Age specified only for larger group; not individual genotypes
Yang	2009	Eur J Clin Pharmacol	19172254	20	NA	single oral	Fasted	*2/2	Chinese	6	0	19-21	Yes	Yes	Age specified only for larger group; not individual genotypes
Yin	2004	J Clin Pharmacol	15145965	40	Losec, MUPS, generic	single oral	Fasted	wt/wt	Chinese	9	0	19-22	Yes	Yes
Yin	2004	J Clin Pharmacol	15145965	40	Losec, MUPS, generic	single oral	Fasted	wt/m1 & wt/m2	Chinese	10	0	20-23	Yes	Yes
Yin	2004	J Clin Pharmacol	15145965	40	Losec, MUPS, generic	single oral	Fasted	m1/m1 & m1/m2	Chinese	7	0	21-23	Yes	Yes
Zhou	1999	Eur J Clin Pharmacol	10206083	Do not use: DDI with clarithromycin but only interaction data provided (no OME alone); DDI ratios per phenotype not provided

## Sheet: Lansoprazole docs
Author	Year	Journal	Accession #	Dose (mg)	Brand	Regimen	Fasted/Fed	CYP2C19 phenotypes	Population	Subject #	Fraction female	Age (years)	Conc data?	PK parameters?	Notes
Furuta	2001	Clin Pharmacol Ther	11719736	30	NA	8-day repeat oral	Fasted	wt/wt	Japanese	7	0.166667	22-25	Yes	Yes
Furuta	2001	Clin Pharmacol Ther	11719736	30	NA	8-day repeat oral	Fasted	wt/m1 & wt/m2	Japanese	7	0	25-26	Yes	Yes
Furuta	2001	Clin Pharmacol Ther	11719736	30	NA	8-day repeat oral	Fasted	m1/m1 & m1/m2	Japanese	4	0.25	24-27	Yes	Yes
Gumus	2012	Eur J Clin Pharmacol	22076562	No useful data (no concentration or PK parameter data); pediatric
Hunfeld	2008	Br J Clin Pharmacol	18241283	15	capsules	6-day repeat oral	Unknown	*1/*1	Caucasian	5	0.4	20-29	No	Yes	Age specified only for larger group; not individual genotypes
Hunfeld	2008	Br J Clin Pharmacol	18241283	15	capsules	6-day repeat oral	Unknown	*1/*2	Caucasian	4	0.75	20-29	No	Yes	Age specified only for larger group; not individual genotypes
Hunfeld	2008	Br J Clin Pharmacol	18241283	15	capsules	6-day repeat oral	Unknown	*1/*17	Caucasian	1	0	20-29	No	Yes	Age specified only for larger group; not individual genotypes
Hunfeld	2008	Br J Clin Pharmacol	18241283	15	capsules	6-day repeat oral	Unknown	*2/*2	Caucasian	0	0	20-29	No	Yes	Age specified only for larger group; not individual genotypes
Hunfeld	2008	Br J Clin Pharmacol	18241283	15	capsules	6-day repeat oral	Unknown	*2/*17	Caucasian	1	1	20-29	No	Yes	Age specified only for larger group; not individual genotypes
Ieiri	2012	Int J Clin Pharmacol Ther	22853867	0.05-0.07	Takepron	single oral	Fasted	wt/wt	Japanese?	8	0	20-33	Yes	Yes	Exclude b/c microdosing
Ieiri	2012	Int J Clin Pharmacol Ther	22853867	0.05-0.07	Takepron	single oral	Fasted	wt/mt	Japanese?	2	0	20-33	Yes	Yes	Exclude b/c microdosing
Ieiri	2012	Int J Clin Pharmacol Ther	22853867	0.05-0.07	Takepron	single oral	Fasted	mt/mt	Japanese?	7	0	20-33	Yes	Yes	Exclude b/c microdosing
Ieiri	2001	Eur J Clin Pharmacol	11699613	30	Takepron	8-day repeat dose	Fasted	*1/*1	Japanese?	5	0.333333	20-26	No	Yes	Sex/age specified only for larger group; not individual genotypes
Ieiri	2001	Eur J Clin Pharmacol	11699613	30	Takepron	8-day repeat dose	Fasted	*1/*3	Japanese?	5	0.333333	20-26	No	Yes	Sex/age specified only for larger group; not individual genotypes
Ieiri	2001	Eur J Clin Pharmacol	11699613	30	Takepron	8-day repeat dose	Fasted	*2/*2 & *2/*3 & *3/*3	Japanese?	5	0.333333	20-26	No	Yes	Sex/age specified only for larger group; not individual genotypes
Itagaki	2004	J Pharm Pharmacol	15285851	No useful data (tacrolimus-focused PK)
Li	2014	Eur J Drug Metab Pharmacokinet	24022708	30	Takepron	single oral	Fasted	*1/*1	Chinese	10	Unknown	20-27	Yes	Yes	Age specified only for larger group; not individual genotypes
Li	2014	Eur J Drug Metab Pharmacokinet	24022708	30	Takepron	single oral	Fasted	*1/*2 & *1/*3	Chinese	11	Unknown	20-27	Yes	Yes	Age specified only for larger group; not individual genotypes
Li	2014	Eur J Drug Metab Pharmacokinet	24022708	30	Takepron	single oral	Fasted	*2/*3	Chinese	3	Unknown	20-27	Yes	Yes	Age specified only for larger group; not individual genotypes
Miura	2010	Xenobiotica	20528170	Data from patients with oesophagectomy
Miura	2005	Br J Clin Pharmacol	15963095	60	Takepron	single oral	Fasted	*1/*1	Japanese	6	Unknown	20-29	Yes	Yes	DDI with fluvoxamine
Miura	2005	Br J Clin Pharmacol	15963095	60	Takepron	single oral	Fasted	*1/*2 & *1/*3	Japanese	6	Unknown	20-30	Yes	Yes	DDI with fluvoxamine
Miura	2005	Br J Clin Pharmacol	15963095	60	Takepron	single oral	Fasted	*2/*3 & *2/*3	Japanese	6	Unknown	22-29	Yes	Yes	DDI with fluvoxamine
Qiao	2006	Eur J Clin Pharmacol	16402242	30	Takepron	single oral	Fasted	*1/*1	Chinese	6	0.166667	20-23	Yes	Yes
Qiao	2006	Eur J Clin Pharmacol	16402242	30	Takepron	single oral	Fasted	*1/*3 & *1/*2	Chinese	6	0.166667	20-25	Yes	Yes
Qiao	2006	Eur J Clin Pharmacol	16402242	30	Takepron	single oral	Fasted	*2/*2 & *2/*3 & *3/*3	Chinese	6	0.166667	19-24	Yes	Yes
Saito	2005	Br J Clin Pharmacol	15752376	60	Takepron	single oral	Fasted	*1/*1	Japanese	6	0.333333	22-40	Yes	Yes	DDI with clarithromycin
Saito	2005	Br J Clin Pharmacol	15752376	60	Takepron	single oral	Fasted	*1/*2 & *1/*3	Japanese	6	0.333333	22-40	Yes	Yes	DDI with clarithromycin
Saito	2005	Br J Clin Pharmacol	15752376	60	Takepron	single oral	Fasted	*2/*2 & *2/*3	Japanese	6	0.333333	22-40	Yes	Yes	DDI with clarithromycin
Sakai	2001	Pharm Res	11474773	30	Takepron	single oral	Fasted	*1/*1	Japanese	6	0.166667	23-29	Yes	Yes
Sakai	2001	Pharm Res	11474773	30	Takepron	single oral	Fasted	*1/*2 & *1/*3	Japanese	6	0.166667	23-30	Yes	Yes
Sakai	2001	Pharm Res	11474773	30	Takepron	single oral	Fasted	*2/*2 & *2/*3 & *3/*3	Japanese	6	0.166667	22-29	Yes	Yes
Uno	2005	J Clin Pharmacol	15901751	60	Takepron	single oral	Fasted	*1/*1	Japanese	7	0.428571	21-30	Yes	Yes	Sex/age specified only for larger group; not individual genotypes
Uno	2005	J Clin Pharmacol	15901751	60	Takepron	single oral	Fasted	*1/*2 & *1/*3	Japanese	7	0.428571	21-30	Yes	Yes	Sex/age specified only for larger group; not individual genotypes
Uno	2005	J Clin Pharmacol	15901751	60	Takepron	single oral	Fasted	*2/*2 & *2/*3	Japanese	7	0.428571	21-30	Yes	Yes	Sex/age specified only for larger group; not individual genotypes
Xu	2010	Pharm Biol	20673183	30	NA	single oral	Fasted	EM	Chinese?	9	0	19-22	Yes	Yes
Xu	2010	Pharm Biol	20673183	30	NA	single oral	Fasted	het EM	Chinese?	8	0	20-23	Yes	Yes
Xu	2010	Pharm Biol	20673183	30	NA	single oral	Fasted	PM	Chinese?	5	0	20-23	Yes	Yes
Yasui-Furukori	2004	J Clin Pharmacol	15496639	40	Takepron	single oral	Fasted	*1/*1	Japanese	6	0.5	21-29	Yes	Yes	DDI with fluvoxamine
Yasui-Furukori	2004	J Clin Pharmacol	15496639	40	Takepron	single oral	Fasted	*1/*2 & *1/*3	Japanese	6	0.5	20-30	Yes	Yes	DDI with fluvoxamine
Yasui-Furukori	2004	J Clin Pharmacol	15496639	40	Takepron	single oral	Fasted	*2/*2 & *2/*3	Japanese	6	0.5	22-30	Yes	Yes	DDI with fluvoxamine
Zhang	2011	Xenobiotica	21521077	30	NA	single oral	Fasted	wt/wt	Chinese	12	0	21-31	Yes	Yes
Zhang	2011	Xenobiotica	21521077	30	NA	single oral	Fasted	wt/m1 & wt/m2	Chinese	8	0	22-31	Yes	Yes
Zhang	2011	Xenobiotica	21521077	30	NA	single oral	Fasted	m1/m1 & m1/m2 & m2/m2	Chinese	4	0	23-28	Yes	Yes
Zhou	2019	Eur J Pharm Sci	31479720	PBPK model that cites other papers for raw data

## Sheet: S-mephenytoin docs
Author	Year	Journal	Accession #	Dose (mg)	Brand	Regimen	Fasted/Fed	CYP2C19 phenotypes	Population	Subject #	Fraction female	Age (years)	Conc data?	PK parameters?	Notes
Chang	1995	Pharmacogenetics	8747407	No useful data (no concentration or PK parameter data)
Daniel	1996	Psychopharmacol Bull	8783891	No useful data (no concentration or PK parameter data)
Edeki	1996	Pharmacogenetics	8873222	No useful data (no concentration or PK parameter data)
He	2002	Eur J Clin Pharmacol	11956668	No useful data (no concentration or PK parameter data)
Herrlin	1998	Clin Pharmacol Ther	9797796	No useful data (no concentration or PK parameter data)
Jurima-Romet	1996	Pharmacogenetics	8873219	No useful data (no concentration or PK parameter data)
Klaassen	2008	Eur J Clin Pharmacol	18071681	No useful data (no concentration or PK parameter data)
Masimirembwa	1995	Clin Pharmacol Ther	7781265	No useful data (no concentration or PK parameter data)
Shirasaka	2016	Pharmacogenomics J	26323597	No useful data (in vitro incubation data only)
Wedlund	1985	J Pharmacol Exp Ther	4032286	300	NA	single oral	Fasted	EM	US?	8	0	21-76	Yes	No	Age specified only for larger group; not individual genotypes
Wedlund	1985	J Pharmacol Exp Ther	4032286	200	NA	single oral	Fasted	PM	US?	6	0	21-76	Yes	No	Age specified only for larger group; not individual genotypes
Wedlund	1985	J Pharmacol Exp Ther	4032286	100	NA	single oral	Fasted	IM	US?	1	0	21-76	Yes	No	Age specified only for larger group; not individual genotypes
Wedlund	1985	J Pharmacol Exp Ther	4032286	100	NA	14-day repeat dose	Fasted	EM	US?	1	0	21-76	Yes	No	Age specified only for larger group; not individual genotypes
