# Supplementary material for: Performance Verification of CYP2C19 Enzyme Abundance Polymorphism Settings within the Simcyp Simulator v21
Source: Metabolites. 2022 Oct 20;12(10):1001. doi: 10.3390/metabo12101001 (PMC9607610; doi:10.3390/metabo12101001)
Supplement: Supplementary file 1 [file metabolites-12-01001-s001.zip › Supp Table S3 CYP2C19 phenotype Sim vs Obs.xlsx]

## Sheet: Omeprazole
		Simulated		Observed		Simulated/Observed		# of data points		Cmax # within 2-fold	AUC # within 2-fold
Study	CYP2C19 phenotype	Cmax (ng/mL)	AUC (ng*h/mL)	Cmax (ng/mL)	AUC (ng*h/mL)	Cmax	AUC	Cmax	AUC	>=0.5 and <=2.00	>=0.5 and <=2.00	Ethnic Group
Baldwin 2008	NM	163	504	364	717	0.45	0.7	17	27	10	24	Caucasian	Simulated data is arithmatic mean
Cho 2002	NM	238	850	494	917	0.48	0.93					Korean	Observed data is mean (arithmatic means assumed)
Furuta 1999_10511062	NM	221	612	NA	384	NA	1.59					Japanese
Furuta 1999_10340921	NM	221	612	NA	421	NA	1.45					Japanese	NM	*1/*1
He 2003	NM	238	850	300	722	0.79	1.18					Chinese	PM	*2/*2	*3/*3	*2/*3
Hu 2007	NM	238	850	514	1645	0.46	0.52					Chinese	IM	*1/*2	*1/*3	*2/*17
Hunfeld 2008	NM	163	504	NA	570	NA	0.88	Oral	NM			Caucasian	RM	*1/*17
Ieiri 1996	NM	221	612	345	587	0.64	1.04	Obs Cmax Median	364			Japanese	UM	*17/*17
Ieiri 2005	NM	221	612	383	647	0.58	0.95	Low	187			Japanese
Jin 2009	NM	238	850	362	693	0.66	1.23	High	1625			Korean
Michaud 2014	NM	163	504	NA	443	NA	1.14					Caucasian		Korean modeled as Chinese
Nazir 2016	NM	163	504	1250	3200	0.13	0.16	Obs AUC Median	693			Pakistani		Pakistani as Caucasian
Nazir 2015	NM	163	504	1625	4150	0.1	0.12	Low	384			Pakistani
Park 2017	NM	238	850	NA	713	NA	1.19	High	4150			Korean
Qiao 2006	NM	238	850	187	533	1.27	1.59					Chinese
Roman 2014	NM	163	504	417	830	0.39	0.61					Caucasian
Sakai 2001	NM	221	612	251	618	0.88	0.99	IV	NM			Japanese
Shimizu 2006	NM	221	612	262	512	0.84	1.2	Obs AUC Median	1282			Japanese
Shirai 2001	NM	221	612	NA	524	NA	1.17	Low	683			Japanese
Tu 2010	NM	238	850	450	1000	0.53	0.85	High	1441			Chinese
Uno 2007	NM	221	612	277	582	0.8	1.05					Japanese
Yang 2009	NM	238	850	810	2980	0.29	0.29					Chinese
Yin 2004	NM	238	850	364	723	0.65	1.18					Chinese
Ishizawa 2005_IV	NM	NA	1093	NA	1441	NA	0.76					Japanese
Shimizu 2006_IV	NM	NA	1093	NA	1128	NA	0.97					Japanese
Shiohira 2012_IV	NM	NA	1093	NA	683	NA	1.6					Japanese
Uno 2007_IV	NM	NA	1093	NA	1435	NA	0.76					Japanese
Chang 1995	IM	209	789	347	908	0.6	0.87	16	26	8	22	Caucasian
Furuta 1999_10511062	IM	288	1013	NA	1002	NA	1.01					Japanese
Furuta 1999_10340921	IM	288	1013	NA	1403	NA	0.72					Japanese
He 2003	IM	304	1335	283	895	1.07	1.49		IM			Chinese
Hu 2007	IM	304	1335	567	1759	0.54	0.76	Obs Cmax Median	597			Chinese
Hunfeld 2008	IM	209	789	NA	2180	NA	0.36	Low	283			Caucasian
Ieiri 1996	IM	288	1013	647	1599	0.45	0.63	High	1588			Japanese
Ieiri 2005	IM	288	1013	290	654	0.99	1.55					Japanese
Jin 2009	IM	304	1335	503	1303	0.6	1.02	Obs AUC Median	1427			Korean
Michaud 2014	IM	209	789	NA	895	NA	0.88	Low	654			Caucasian
Nazir 2016	IM	209	789	1300	3500	0.16	0.23	High	4300			Pakistani
Nazir 2015	IM	209	789	1588	4300	0.13	0.18					Pakistani
Park 2017	IM	304	1335	NA	973	NA	1.37					Korean
Qiao 2006	IM	304	1335	391	1489	0.78	0.9	IV	IM			Chinese
Roman 2014	IM	209	789	654	1460	0.32	0.54	Obs AUC Median	2094			Caucasian
Sakai 2001	IM	288	1013	623	1062	0.46	0.95	Low	1476			Japanese
Shimizu 2006	IM	288	1013	698	1863	0.41	0.54	High	2495			Japanese
Shirai 2001	IM	288	1013	NA	1096	NA	0.92					Japanese
Tu 2010	IM	304	1335	630	1450	0.48	0.92					Chinese
Uno 2007	IM	288	1013	571	1547	0.5	0.65					Japanese
Yang 2009	IM	304	1335	1010	3900	0.3	0.34					Chinese
Yin 2004	IM	304	1335	434	1196	0.7	1.12					Chinese
Ishizawa 2005_IV	IM	NA	1518	NA	1761	NA	0.86					Japanese
Shimizu 2006_IV	IM	NA	1518	NA	2427	NA	0.63					Japanese
Shiohira 2012_IV	IM	NA	1518	NA	1476	NA	1.03					Japanese
Uno 2007_IV	IM	NA	1518	NA	2495	NA	0.61					Japanese
Chang 1995	PM	481	4134	1036	4930	0.46	0.84	17	26	12	25	Caucasian
Cho 2002	PM	695	6443	1326	5213	0.52	1.24					Korean
Furuta 1999_10511062	PM	684	6427	NA	5590	NA	1.15					Japanese
Furuta 1999_10340921	PM	684	6427	NA	5109	NA	1.26		PM			Japanese
He 2003	PM	695	6443	1015	5364	0.68	1.2	Obs Cmax Median	1117			Chinese
Hu 2007	PM	695	6443	1152	6828	0.6	0.94	Low	680			Chinese
Ieiri 1996	PM	684	6427	1185	4352	0.58	1.48	High	1984			Japanese
Ieiri 2005	PM	684	6427	889	3284	0.77	1.96					Japanese
Jin 2009	PM	695	6443	1050	4659	0.66	1.38	Obs AUC Median	4623			Korean
Michaud 2014	PM	481	4134	NA	3581	NA	1.15	Low	1960			Caucasian
Nazir 2016	PM	481	4134	1750	4500	0.27	0.92	High	7130			Pakistani
Nazir 2015	PM	481	4134	1984	4850	0.24	0.85					Pakistani
Park 2017	PM	695	6443	NA	3652	NA	1.76					Korean
Qiao 2006	PM	695	6443	821	4103	0.85	1.57	IV	PM			Chinese
Roman 2014	PM	481	4134	739	4566	0.65	0.91	Obs AUC Median	6557			Caucasian
Sakai 2001	PM	684	6427	1070	4587	0.64	1.4	Low	5975			Japanese
Shimizu 2006	PM	684	6427	1144	4309	0.6	1.49	High	7808			Japanese
Shirai 2001	PM	684	6427	NA	5607	NA	1.15					Japanese
Tu 2010	PM	695	6443	680	1960	1.02	3.29					Chinese
Uno 2007	PM	684	6427	1391	5256	0.49	1.22					Japanese
Yang 2009	PM	695	6443	1590	7130	0.44	0.9					Chinese
Yin 2004	PM	695	6443	1117	3987	0.62	1.62					Chinese
Ishizawa 2005_IV	PM	NA	7193	NA	6892	NA	1.04					Japanese
Shimizu 2006_IV	PM	NA	7193	NA	7808	NA	0.92					Japanese
Shiohira 2012_IV	PM	NA	7193	NA	5975	NA	1.2					Japanese
Uno 2007_IV	PM	NA	7193	NA	6222	NA	1.16					Japanese
Hunfeld 2008	RM	140	442	NA	385	NA	1.15	1	2	0	2	Caucasian
Roman 2014	RM	140	442	362	549	0.39	0.81					Caucasian
Baldwin 2008	UM	102	263	250	341	0.41	0.77	2	3	1	3	Caucasian
Chang 1995	UM	102	263	136	247	0.75	1.06					Caucasian
Michaud 2014	UM	102	263	NA	216	NA	1.22		RM		UM	Caucasian
								Obs Cmax Median	362	Obs Cmax Median	193
								Low	362	Low	136
								High	362	High	250
								Obs AUC Median	467	Obs AUC Median	247
								Low	385	Low	216
								High	549	High	341

## Sheet: Lansoprazole
		Simulated		Observed		Simulated/Observed		# of data points		Cmax # within 2-fold	AUC # within 2-fold
Study	CYP2C19 phenotype	Cmax (ng/mL)	AUC (ng*h/mL)	Cmax (ng/mL)	AUC (ng*h/mL)	Cmax	AUC	Cmax	AUC	>=0.5 and <=2.00	>=0.5 and <=2.00	Ethnic Group
Hunfeld 2008	NM	1007	2158	NA	2080	NA	1.04	10	11	9	11	Caucasian	Simulated data is arithmatic mean
Ieiri 2001	NM	1215	2536	900	2000	1.35	1.27					Japanese	Observed data is mean (arithmatic means assumed)
Li 2014	NM	1258	3107	783	1961	1.61	1.58		NM			Chinese
Miura 2005	NM	1215	2536	1147	2767	1.06	0.92	Obs Cmax Median	1069			Japanese
Qiao 2006	NM	1258	3107	1043	2972	1.21	1.05	Low	468			Chinese	NM	*1/*1
Saito 2005	NM	1215	2536	1095	2326	1.11	1.09	High	2014			Japanese	PM	*2/*2	*3/*3	*2/*3
Sakai 2001	NM	1215	2536	849	2549	1.43	0.99					Japanese	IM	*1/*2	*1/*3	*2/*17
Uno 2005	NM	1215	2536	1196	2856	1.02	0.89	Obs AUC Median	2549			Japanese	RM	*1/*17
Xu 2010	NM	1258	3107	1830	4509	0.69	0.69	Low	1580			Chinese	UM	*17/*17
Yasui-Furukori 2004	NM	1215	2536	2014	4780	0.6	0.53	High	4780			Japanese
Zhang 2011	NM	1258	3107	468	1580	2.69	1.97					Chinese
Hunfeld 2008	IM	1146	2988	NA	3140	NA	0.95	10	11	9	10	Caucasian
Ieiri 2001	IM	1390	3562	1100	3600	1.26	0.99					Japanese
Li 2014	IM	1425	4305	1004	3211	1.42	1.34		IM			Chinese
Miura 2005	IM	1390	3562	1362	4134	1.02	0.86	Obs Cmax Median	1354			Japanese
Qiao 2006	IM	1425	4305	1397	5150	1.02	0.84	Low	791			Chinese
Saito 2005	IM	1390	3562	1345	4150	1.03	0.86	High	2943			Japanese
Sakai 2001	IM	1390	3562	955	3484	1.46	1.02					Japanese
Uno 2005	IM	1390	3562	1424	4250	0.98	0.84	Obs AUC Median	4134			Japanese
Xu 2010	IM	1425	4305	2943	9289	0.48	0.46	Low	2553			Chinese
Yasui-Furukori 2004	IM	1390	3562	2193	6680	0.63	0.53	High	9289			Japanese
Zhang 2011	IM	1425	4305	791	2553	1.8	1.69					Chinese
Ieiri 2001	PM	1999	14848	1800	11100	1.11	1.34	10	10	9	7	Japanese
Li 2014	PM	2063	16691	1166	6188	1.77	2.7					Chinese
Miura 2005	PM	1999	14848	1836	12012	1.09	1.24		PM			Japanese
Qiao 2006	PM	2063	16691	1792	11937	1.15	1.4	Obs Cmax Median	1813			Chinese
Saito 2005	PM	1999	14848	1825	12647	1.1	1.17	Low	1166			Japanese
Sakai 2001	PM	1999	14848	1550	9380	1.29	1.58	High	4956			Japanese
Uno 2005	PM	1999	14848	2054	12962	0.97	1.15					Japanese
Xu 2010	PM	2063	16691	4956	36100	0.42	0.46	Obs AUC Median	11975			Chinese
Yasui-Furukori 2004	PM	1999	14848	3173	20000	0.63	0.74	Low	6188			Japanese
Zhang 2011	PM	2063	16691	1320	6461	1.56	2.58	High	36100			Chinese
Hunfeld 2008	RM	891	1871	NA	940	NA	1.99	0	1	0	1	Caucasian

## Sheet: Individual studies
			Simulated		Observed		Simulated/Observed
Study	Substrate	CYP2C19 phenotype	Cmax (ng/mL)	AUC (ng*h/mL)	Cmax (ng/mL)	AUC (ng*h/mL)	Cmax	AUC
Baldwin 2008	Omeprazole	NM	368	1449	728	1434				Simulated data is arithmatic mean
	Omeprazole	UM	195	532	500	681				Observed data is mean (arithmatic means assumed)
	Omeprazole	UM/NM ratio	0.53	0.37	0.69	0.47	0.77	0.79
										NM	*1/*1
Chang 1995	Omeprazole	UM	133	433	136	247				PM	*2/*2	*3/*3	*2/*3
	Omeprazole	IM	245	1108	347	908				IM	*1/*2	*1/*3	*2/*17
	Omeprazole	PM	508	4351	1036	4930				RM	*1/*17
		UM/IM ratio	0.54	0.39	0.39	0.27	1.38	1.44		UM	*17/*17
		PM/IM ratio	2.07	3.93	2.99	5.43	0.69	0.72
Hunfeld 2008 Study A	Lansoprazole	NM	NA	965	NA	1040
	Lansoprazole	IM	NA	1511	NA	1570
	Lansoprazole	RM	NA	953	NA	470
		IM/NM ratio		1.57		1.51		1.04
		RM/NM ratio		0.99		0.45		2.2
	Omeprazole	NM	NA	199	NA	250
	Omeprazole	IM	NA	349	NA	465
	Omeprazole	RM	NA	200	NA	140
		IM/NM ratio		1.75		1.86		0.94
		RM/NM ratio		1.01		0.56		1.8
Hunfeld 2008 Study B	Omeprazole Day 1	NM	NA	517	NA	640
	Omeprazole Day 1	PM	NA	3861	NA	3440
	Omeprazole Day 1	IM	NA	732	NA	2240
	Omeprazole Day 1	RM	NA	340	NA	490
		IM/NM ratio		1.42		3.5		0.41
		PM/NM ratio		7.47		5.38		1.39
		RM/NM ratio		0.66		0.77		0.86
	Omeprazole Day 6	NM	NA	877	NA	1110
	Omeprazole Day 6	PM	NA	4249	NA	4220
	Omeprazole Day 6	IM	NA	1327	NA	3535
	Omeprazole Day 6	RM	NA	536	NA	860
		IM/NM ratio		1.51		3.18		0.47
		PM/NM ratio		4.84		3.8		1.27
		RM/NM ratio		0.61		0.77		0.79
Michaud 2014	Omeprazole	NM	NA	511	NA	443
	Omeprazole	PM	NA	3949	NA	3581
	Omeprazole	IM	NA	656	NA	895
	Omeprazole	UM	NA	216	NA	216
		IM/NM ratio		1.28		2.02		0.63
		PM/NM ratio		7.73		8.08		0.96
		UM/NM ratio		0.42		0.49		0.86
Roman 2014	Omeprazole	NM	360	1268	834	1659
	Omeprazole	IM	409	1614	1307	2920
	Omeprazole	PM	948	7976	1478	9131
	Omeprazole	RM	267	792	723	1097
		IM/NM ratio	1.14	1.27	1.57	1.76	0.73	0.72
		PM/NM ratio	2.63	6.29	1.77	5.5	1.49	1.14
		RM/NM ratio	0.74	0.62	0.87	0.66	0.85	0.94

## Sheet: DDI ratios
Study	Substrate	Perpetrator	CYP2C19	SimCmaxratio	SimAUCratio	ObsCmaxratio	ObsAUCratio	cmax_SimvObs	AUC_SimvObs
Miura 2005	Lansoprazole	Fluvoxamine	NM	1.58	3.56	3.51	9.46	0.45	0.38
Yasuri-Furukori 2004	Lansoprazole	Fluvoxamine	NM	1.58	3.54	1.54	3.83	1.03	0.92
Saito 2005	Lansoprazole	Clarithromycin	NM	1.03	1.08	1.27	1.38	0.81	0.78
Miura 2005	Lansoprazole	Fluvoxamine	IM	1.39	3.05	2.38	4.5	0.58	0.68
Yasuri-Furukori 2004	Lansoprazole	Fluvoxamine	IM	1.39	3.04	1.21	2.5	1.15	1.22
Saito 2005	Lansoprazole	Clarithromycin	IM	1.03	1.1	1.67	1.76	0.62	0.63
Miura 2005	Lansoprazole	Fluvoxamine	PM	1.01	1.02	1.78	2.23	0.57	0.46
Yasuri-Furukori 2004	Lansoprazole	Fluvoxamine	PM	1.01	1.02	0.89	1.04	1.14	0.98
Saito 2005	Lansoprazole	Clarithromycin	PM	1.06	1.5	1.5	1.81	0.71	0.83
Furuta 1999	Omeprazole	Clarithromycin	NM	1.06	1.12	2.61	2.12	0.41	0.53
Ieiri 2005	Omeprazole	Ticlopidine	NM	2.39	5.61	2.99	6.22	0.8	0.9
Furuta 1999	Omeprazole	Clarithromycin	IM	1.08	1.22	2.18	2.11	0.5	0.58
Ieiri 2005	Omeprazole	Ticlopidine	IM	2.1	4.9	3.38	5.01	0.62	0.98
Furuta 1999	Omeprazole	Clarithromycin	PM	1.28	2.68	1.73	2.34	0.74	1.15
Ieiri 2005	Omeprazole	Ticlopidine	PM	1	1	0.94	0.98	1.06	1.02
